# Supplementary material for: SNP-based heritability estimates of gout and its subtypes determined by genome-wide association studies of clinically defined gout
Source: PubMed Central journal article supplement — Rheumatology (Oxford). 2022 Oct 17;62(5):e144–6. doi: 10.1093/rheumatology/keac597 (PMC10152276; doi:10.1093/rheumatology/keac597), 2022-10-17
Supplement: keac597_supplementary_data.pdf [file keac597_supplementary_data.pdf]

## Supplementary Material

### SNP-based heritability estimates of gout and its subtypes determined by genome-wide association studies of clinically defined gout

Yu Toyoda, Masahiro Nakatochi, Akiyoshi Nakayama, *et al.*

Correspondence to:

Hirotsuka Matsuo (hmatsuo.ndmc@gmail.com)

---

**Supplementary Methods**

**Supplementary References**

**Supplementary Tables**

**Supplementary Figure**

## Supplementary Methods

### *Ethics Statement*

Data and sample collection from the cohorts participating in the present study were approved by the individual research ethics committees (National Defense Medical College and Nagoya University). All the studies were performed according to the guidelines of the Declaration of Helsinki. All the participants had provided their written informed consent. This research was carried out without patient involvement.

### *Gout patients as cases and non-gout subjects for controls*

An overview of the characteristics of the study populations is provided in **Supplementary Table S6**. The analyzed set consists of two groups of Japanese males: a clinically-defined gout group consisting of 3,053 patients and a non-gout (control) group consisting of 5,637 subjects, which are respectively the same cohort and a larger cohort than that with 4,554 subjects derived from our previous study, respectively [1]. In brief, patients with known clinical parameters were recruited from Japanese male outpatients at gout clinics as previously described [1]; all the patients were clinically diagnosed with primary gout according to the criteria established by the American College of Rheumatology [2]. Of the 3,053 gout cases, urinary data were available for 2,137 patients; based on clinical parameters, their subtypes of gout (**Fig. 1**) were diagnosed as previously described [1, 3], which resulted in dividing all gout cases into four subtypes: the renal underexcretion (RUE) type (654 cases), the renal overload (ROL) type (486 cases), the combined (RUE + ROL) type (905 cases), and the normal type (92 cases) (**Supplementary Table S7**). In addition to the previously assigned 4,554 subjects as normouricemia controls (serum urate  $\leq 7$  mg/dL; without past histories of gout) [1] who had taken part in the Japan Multi-Institutional Collaborative Cohort Study (J-MICC Study) [4, 5], in this study we enrolled 1,083 hyperuricemia subjects without gout as asymptomatic hyperuricemia controls (serum urate  $> 7$  mg/dL; without gout), who were excluded in the previous study [1], to extend the range covered for serum urate concentrations in controls. With these subjects newly assigned in this study, we conducted single nucleotide polymorphism (SNP) genotyping for a genome-wide association study (GWAS). Meta-analyses using the obtained and previous data were then carried out as described below.

### *Genotyping, quality control, and genotype imputation*

Information regarding study specific genotyping, imputation, and analysis tools is provided in **Supplementary Table S8**. Genotyping, quality control, and imputation for the Japonica Array data set that were obtained using a Japonica SNP Array [6] or the Illumina Array data set, obtained using HumanOmniExpress or HumanOmniExpress-Exome BeadChip Arrays (Illumina, San Diego, CA, USA) have been described previously [1].

Post-imputation quality control was conducted as reported previously [7], with minor modifications; SNPs with an imputation quality of  $r^2 < 0.3$  or a minor allele frequency (MAF) of  $< 1\%$  or  $0.1\%$  were excluded. To identify studies with inflated GWAS significance, which can result from population stratification, we computed the genomic control lambda [8] and the intercept of LD score regression [9]. We calculated the genomic control lambda using R statistical software (ver. 3.6) (<http://www.r-project.org/>).

After passing post-imputation quality control, with the Japonica Array data set, 1,028 case subjects and 1,125 control subjects as well as 8,581,683 (MAF  $\geq 1\%$ ) or 10,779,400 (MAF  $\geq 0.1\%$ ) SNPs remained for the subsequent GWAS analysis; with the Illumina Array data set, 2,025 case subjects and 4,512 control subjects as well as 8,359,615 (MAF  $\geq 1\%$ ) or 10,473,049 (MAF  $\geq 0.1\%$ ) SNPs remained for the subsequent GWAS analysis.

### *Association analysis for SNPs and clinically-defined gout including its subtypes*

The association of SNPs with clinically-defined gout including its subtypes was assessed using logistic regression analysis (generalized linear model), as described previously [1] with minor modifications. In brief, the dependent variable was gout label (case = 1, control = 0), and the independent variables included imputed genotypes of each SNP and covariates—the first ten principal component scores. The effect sizes and standard errors estimated in logistic regression analysis were used in the subsequent meta-analysis. The association analysis was performed using the Efficient and Parallelizable Association Container Toolbox (<https://genome.sph.umich.edu/wiki/EPACTS>).

70  
71  
72  
73  
74  
75  
76  
77  
78  
79  
80  
81  
82  
83  
84  
85  
86  
87  
88  
89  
90  
91  
92  
93  
94

### ***Meta-analyses***

Meta-analyses were performed using a total of 3,053 cases (for all gout; numbers of cases for each subtype are described above) and 5,637 controls from the two data set as described previously [1]. In brief, the association results for each SNP across the studies were combined with METAL software [10] using the fixed-effects inverse-variance-weighted method. Heterogeneity of effect sizes was assessed via the  $I^2$  index. The genome-wide significance level  $\alpha$  was set to a  $P$  value of  $< 5 \times 10^{-8}$ . As an overview of the results, Manhattan plots of the genome-wide meta-analyses for genetic loci are provided in **Fig. 1B–E**.

### ***Estimation of the SNP-based heritability of gout***

Based on the obtained results of our Japanese meta-analyses, SNP-based heritability of gout was estimated using LD score regression [9] as described previously [7]. In brief, the heritability estimates were calculated from the summary statistics of 1,029,593 SNPs for all gout, which have  $MAF \geq 1\%$  and were not palindromic SNPs. With gout subtypes, three parts of the summary statistics of 1,029,179 (for the RUE type), 1,029,019 (for the ROL type), and 1,029,173 (for the combined type) SNPs were used, respectively. In a similar manner, single nucleotide variation (SNV)-based heritability estimates were calculated from 1,058,455 (for all gout), 1,058,284 (for RUE type), 1,058,247 (for ROL type), and 1,058,367 (for combined type) SNVs with  $MAF \geq 0.1\%$ .

### ***Partitioning heritability***

To partition heritability from summary statistics into multiple categories derived from functional annotations for certain parts of a genome, stratified LD score regression was conducted as described previously [11, 12]. In this study, we employed the full baseline model with 53 categories [11] and examined in which functional categories the heritability of gout is enriched. Significant heritability enrichments were defined when the false discovery rate (FDR) was below 0.1, as calculated using the Benjamini and Hochberg method [13].

95 **Supplementary References**

96

- 97 1 Nakayama A, Nakatochi M, Kawamura Y, *et al.* Subtype-specific gout susceptibility loci and enrichment of  
98 selection pressure on ABCG2 and ALDH2 identified by subtype genome-wide meta-analyses of clinically defined  
99 gout patients. *Ann Rheum Dis* 2020;79(5):657-65.
- 100 2 Wallace SL, Robinson H, Masi AT, Decker JL, McCarty DJ, Yu TF. Preliminary criteria for the classification of  
101 the acute arthritis of primary gout. *Arthritis Rheum* 1977;20(3):895-900.
- 102 3 Ichida K, Matsuo H, Takada T, *et al.* Decreased extra-renal urate excretion is a common cause of hyperuricemia.  
103 *Nat Commun* 2012;3:764.
- 104 4 Asai Y, Naito M, Suzuki M, *et al.* Baseline data of Shizuoka area in the Japan Multi-Institutional Collaborative  
105 Cohort Study (J-MICC Study). *Nagoya J Med Sci* 2009;71(3-4):137-44.
- 106 5 Hamajima N, J-Micc Study Group. The Japan Multi-Institutional Collaborative Cohort Study (J-MICC Study) to  
107 detect gene-environment interactions for cancer. *Asian Pac J Cancer Prev* 2007;8(2):317-23.
- 108 6 Kawai Y, Mimori T, Kojima K, *et al.* Japonica array: improved genotype imputation by designing a population-  
109 specific SNP array with 1070 Japanese individuals. *J Hum Genet* 2015;60(10):581-7.
- 110 7 Nakatochi M, Kanai M, Nakayama A, *et al.* Genome-wide meta-analysis identifies multiple novel loci associated  
111 with serum uric acid levels in Japanese individuals. *Commun Biol* 2019;2:115.
- 112 8 Devlin B, Roeder K. Genomic control for association studies. *Biometrics* 1999;55(4):997-1004.
- 113 9 Bulik-Sullivan BK, Loh PR, Finucane HK, *et al.* LD Score regression distinguishes confounding from  
114 polygenicity in genome-wide association studies. *Nat Genet* 2015;47(3):291-5.
- 115 10 Willer CJ, Li Y, Abecasis GR. METAL: fast and efficient meta-analysis of genomewide association scans.  
116 *Bioinformatics* 2010;26(17):2190-1.
- 117 11 Finucane HK, Bulik-Sullivan B, Gusev A, *et al.* Partitioning heritability by functional annotation using genome-  
118 wide association summary statistics. *Nat Genet* 2015;47(11):1228-35.
- 119 12 Kanai M, Akiyama M, Takahashi A, *et al.* Genetic analysis of quantitative traits in the Japanese population links  
120 cell types to complex human diseases. *Nat Genet* 2018;50(3):390-400.
- 121 13 Benjamini Y, Hochberg Y. Controlling the False Discovery Rate: A Practical and Powerful Approach to Multiple  
122 Testing. *J R Stat Soc Ser B Methodol* 1995;57(1):289-300.
- 123 14 Matsuo H, Yamamoto K, Nakaoka H, *et al.* Genome-wide association study of clinically defined gout identifies  
124 multiple risk loci and its association with clinical subtypes. *Ann Rheum Dis* 2016;75(4):652-9.

125

126 **Supplementary Table S1. Estimation of the SNP-based heritability of gout and its subtypes using clinically-**  
 127 **defined gout patients in Japanese populations**  
 128

| Trait         | Prevalence* | vs. non-gout |       | vs. normouricemia |       |
|---------------|-------------|--------------|-------|-------------------|-------|
|               |             | $h^2_g$      | SE    | $h^2_g$           | SE    |
| All gout      | 0.0106      | 0.279        | 0.085 | 0.333             | 0.098 |
| RUE type      | 0.0032      | 0.332        | 0.118 | 0.342             | 0.120 |
| ROL type      | 0.0024      | 0.355        | 0.135 | 0.397             | 0.148 |
| Combined type | 0.0045      | 0.309        | 0.099 | 0.368             | 0.110 |

129 \*Data are derived from previous studies [1, 14]. SNPs with minor allele frequency  $\geq 1\%$  were used for calculation.  
 130 SNP, single nucleotide polymorphism; RUE, renal underexcretion; ROL, renal overload;  $h^2_g$ , heritability; SE,  
 131 standard error of  $h^2$ .  
 132  
 133

134 **Supplementary Table S2. Genetic correlations based on SNPs among major subtypes of gout**  
 135

| Trait 1       | Trait 2  | <i>N</i>  | $r_g$ | SE    | <i>P</i>             |
|---------------|----------|-----------|-------|-------|----------------------|
| Combined type | RUE type | 1,039,419 | 0.683 | 0.193 | $0.4 \times 10^{-4}$ |
| Combined type | ROL type | 1,039,330 | 0.623 | 0.204 | $2.2 \times 10^{-4}$ |
| ROL type      | RUE type | 1,039,423 | 0.737 | 0.189 | $9.9 \times 10^{-5}$ |

136 RUE, renal underexcretion; ROL, renal overload;  $r_g$ , genetic correlation coefficient; SE, standard error of  $r_g$ .  
 137  
 138

139 **Supplementary Table S3. Statistically significant heritability enrichments for clinically-defined gout (all gout)**  
 140

| Categories*            | Prop. SNVs | Prop. $h^2_g$ | Enrichment    | Enrichment <i>P</i> -value | Q-value |
|------------------------|------------|---------------|---------------|----------------------------|---------|
| Enhancer + 500bp       | 0.089      | 0.547 (0.133) | 6.115 (1.486) | $1.12 \times 10^{-3}$      | 0.019   |
| Repressed + 500bp      | 0.720      | 0.279 (0.120) | 0.387 (0.166) | $0.75 \times 10^{-3}$      | 0.019   |
| Super Enhancer + 500bp | 0.170      | 0.440 (0.085) | 2.581 (0.500) | $0.66 \times 10^{-3}$      | 0.019   |
| H3K4me1                | 0.423      | 1.126 (0.294) | 2.663 (0.695) | $6.19 \times 10^{-3}$      | 0.081   |

141 Each value for standard error is noted in brackets. \*Functional categories are from Finucane *et al.* [11]; categories  
 142 with false discovery rate (Q-value)  $< 0.1$  were defined as statistically significant in this analysis.

143 H3k4me1, monomethylation of histone H3 at lysine 4; Prop., proportion; SNVs, single nucleotide variations with  
 144 minor allele frequency  $\geq 0.1\%$ ;  $h^2_g$ , heritability.  
 145  
 146

147 **Supplementary Table S4. Estimation of the SNV-based heritability of gout and its subtypes using clinically-**  
 148 **defined gout patients in Japanese populations**  
 149

| Trait         | Prevalence* | vs. non-gout |       | vs. normouricemia |       |
|---------------|-------------|--------------|-------|-------------------|-------|
|               |             | $h^2_g$      | SE    | $h^2_g$           | SE    |
| All gout      | 0.0106      | 0.294        | 0.083 | 0.346             | 0.096 |
| RUE type      | 0.0032      | 0.349        | 0.118 | 0.362             | 0.120 |
| ROL type      | 0.0024      | 0.379        | 0.131 | 0.428             | 0.144 |
| Combined type | 0.0045      | 0.334        | 0.098 | 0.395             | 0.110 |

150 \*Data are derived from previous studies [1, 14]. SNVs with minor allele frequency  $\geq 0.1\%$  were used for calculation.  
 151 SNV, single nucleotide variation; RUE, renal underexcretion; ROL, renal overload;  $h^2_g$ , heritability; SE, standard  
 152 error of  $h^2_g$ .

**Supplementary Table S5. Significant loci identified in the present genome-wide meta-analysis of SNPs with minor allele frequency  $\geq 1\%$** 

| SNP*                               | Locus    | Position <sup>†</sup> | Gene                  | Alleles |          | Illumina array |       |                      |                        | Japonica array |       |                       |                        | Meta-analysis        |                        |                |      |
|------------------------------------|----------|-----------------------|-----------------------|---------|----------|----------------|-------|----------------------|------------------------|----------------|-------|-----------------------|------------------------|----------------------|------------------------|----------------|------|
|                                    |          |                       |                       | Risk    | Non-risk | RAF            |       | OR (95%CI)           | P value                | RAF            |       | OR (95%CI)            | P value                | OR (95%CI)           | P value                | I <sup>2</sup> | HetP |
| <b>All gout patients</b>           |          |                       |                       |         |          |                |       |                      |                        |                |       |                       |                        |                      |                        |                |      |
| rs6547692                          | 2p23.3   | 27734972              | GCKR                  | G       | A        | 0.623          | 0.547 | 1.30<br>(1.20–1.41)  | 7.10×10 <sup>-11</sup> | 0.608          | 0.563 | 1.18<br>(1.04–1.35)   | 1.07×10 <sup>-2</sup>  | 1.27<br>(1.18–1.36)  | 5.55×10 <sup>-12</sup> | 34.3           | 0.22 |
| rs3775948                          | 4p16.1   | 9995182               | SLC2A9                | C       | G        | 0.680          | 0.587 | 1.55<br>(1.42–1.68)  | 1.16×10 <sup>-24</sup> | 0.673          | 0.565 | 1.61<br>(1.41–1.84)   | 1.47×10 <sup>-12</sup> | 1.56<br>(1.46–1.68)  | 1.44×10 <sup>-35</sup> | 0              | 0.62 |
| rs4148155                          | 4q22.1   | 89054667              | ABCG2                 | G       | A        | 0.454          | 0.289 | 2.04<br>(1.87–2.21)  | 2.80×10 <sup>-63</sup> | 0.462          | 0.281 | 2.17<br>(1.90–2.48)   | 9.86×10 <sup>-30</sup> | 2.07<br>(1.93–2.23)  | 4.49×10 <sup>-91</sup> | 0              | 0.43 |
| rs1184804                          | 6p22.2   | 25868226              | SLC17A3               | C       | T        | 0.874          | 0.829 | 1.31<br>(1.16–1.48)  | 2.00×10 <sup>-5</sup>  | 0.868          | 0.832 | 1.45<br>(1.21–1.75)   | 7.28×10 <sup>-5</sup>  | 1.35<br>(1.22–1.49)  | 9.00×10 <sup>-9</sup>  | 0              | 0.35 |
| rs3129473                          | 10q23.2  | 88922846              | FAM35A                | G       | C        | 0.424          | 0.367 | 1.37<br>(1.25–1.49)  | 9.21×10 <sup>-13</sup> | 0.427          | 0.379 | 1.29<br>(1.12–1.48)   | 2.94×10 <sup>-4</sup>  | 1.35<br>(1.25–1.45)  | 1.48×10 <sup>-15</sup> | 0              | 0.50 |
| rs145954970                        | 11q13.1  | 64273830              | LOC100996455–SLC22A11 | C       | G        | 0.995          | 0.976 | 7.93<br>(4.46–14.08) | 1.71×10 <sup>-12</sup> | 0.997          | 0.971 | 23.47<br>(7.25–76.01) | 1.41×10 <sup>-7</sup>  | 9.77<br>(5.83–16.38) | 5.05×10 <sup>-18</sup> | 62.2           | 0.10 |
| rs671                              | 12q24.12 | 112241766             | ALDH2                 | G       | A        | 0.823          | 0.737 | 1.80<br>(1.63–1.99)  | 5.64×10 <sup>-32</sup> | 0.821          | 0.687 | 2.00<br>(1.73–2.32)   | 4.96×10 <sup>-20</sup> | 1.86<br>(1.72–2.02)  | 4.97×10 <sup>-50</sup> | 23.7           | 0.25 |
| rs76499759                         | 13q22.1  | 73568511              | PIBF1                 | A       | G        | 0.219          | 0.181 | 1.29<br>(1.17–1.42)  | 2.34×10 <sup>-7</sup>  | 0.212          | 0.183 | 1.21<br>(1.04–1.41)   | 1.61×10 <sup>-2</sup>  | 1.27<br>(1.17–1.38)  | 1.51×10 <sup>-8</sup>  | 0              | 0.49 |
| rs7224656                          | 17q23.2  | 59434815              | BCAS3                 | A       | T        | 0.447          | 0.404 | 1.19<br>(1.10–1.30)  | 3.47×10 <sup>-5</sup>  | 0.462          | 0.409 | 1.28<br>(1.13–1.47)   | 1.94×10 <sup>-4</sup>  | 1.22<br>(1.14–1.31)  | 3.95×10 <sup>-8</sup>  | 0              | 0.35 |
| <b>RUE type gout patients</b>      |          |                       |                       |         |          |                |       |                      |                        |                |       |                       |                        |                      |                        |                |      |
| rs3775948                          | 4p16.1   | 9995182               | SLC2A9                | C       | G        | 0.705          | 0.587 | 1.75<br>(1.50–2.04)  | 1.47×10 <sup>-12</sup> | 0.717          | 0.565 | 1.98<br>(1.56–2.50)   | 1.45×10 <sup>-8</sup>  | 1.81<br>(1.59–2.06)  | 1.79×10 <sup>-19</sup> | 0              | 0.39 |
| rs4148155                          | 4q22.1   | 89054667              | ABCG2                 | G       | A        | 0.388          | 0.289 | 1.56<br>(1.35–1.81)  | 2.47×10 <sup>-9</sup>  | 0.382          | 0.281 | 1.57<br>(1.26–1.95)   | 6.82×10 <sup>-5</sup>  | 1.57<br>(1.38–1.77)  | 7.46×10 <sup>-13</sup> | 0              | 0.99 |
| rs9420434                          | 10q23.2  | 88843209              | GLUD1(SHLD2)          | C       | T        | 0.316          | 0.253 | 1.45<br>(1.25–1.70)  | 1.79×10 <sup>-6</sup>  | 0.342          | 0.247 | 1.61<br>(1.28–2.03)   | 4.60×10 <sup>-5</sup>  | 1.50<br>(1.32–1.71)  | 4.52×10 <sup>-10</sup> | 0              | 0.46 |
| rs76741582                         | 11q13.1  | 64247850              | LOC100996455–SLC22A11 | T       | C        | 0.028          | 0.010 | 3.05<br>(1.89–4.94)  | 5.49×10 <sup>-6</sup>  | 0.036          | 0.008 | 5.23<br>(2.51–10.90)  | 9.83×10 <sup>-6</sup>  | 3.59<br>(2.40–5.37)  | 4.81×10 <sup>-10</sup> | 31.1           | 0.23 |
| rs4646776                          | 12q24.12 | 112230019             | ALDH2                 | G       | C        | 0.819          | 0.734 | 1.79<br>(1.50–2.15)  | 3.28×10 <sup>-10</sup> | 0.796          | 0.683 | 1.78<br>(1.38–2.32)   | 1.33×10 <sup>-5</sup>  | 1.79<br>(1.54–2.08)  | 2.07×10 <sup>-14</sup> | 0              | 0.97 |
| <b>ROL type gout patients</b>      |          |                       |                       |         |          |                |       |                      |                        |                |       |                       |                        |                      |                        |                |      |
| rs4148155                          | 4q22.1   | 89054667              | ABCG2                 | G       | A        | 0.515          | 0.289 | 2.67<br>(2.26–3.14)  | 9.99×10 <sup>-32</sup> | 0.493          | 0.281 | 2.34<br>(1.81–3.03)   | 1.40×10 <sup>-10</sup> | 2.57<br>(2.24–2.95)  | 1.43×10 <sup>-40</sup> | 0              | 0.40 |
| rs12231737                         | 12q24.13 | 112574616             | TRAFD1(ALDH2)         | C       | T        | 0.812          | 0.757 | 1.88<br>(1.46–2.43)  | 1.11×10 <sup>-6</sup>  | 0.810          | 0.668 | 2.10<br>(1.52–2.91)   | 7.95×10 <sup>-6</sup>  | 1.96<br>(1.61–2.40)  | 4.46×10 <sup>-11</sup> | 0              | 0.60 |
| <b>Combined type gout patients</b> |          |                       |                       |         |          |                |       |                      |                        |                |       |                       |                        |                      |                        |                |      |
| rs1260326                          | 2p23.3   | 27730940              | GCKR                  | T       | C        | 0.647          | 0.550 | 1.42<br>(1.25–1.62)  | 1.95×10 <sup>-7</sup>  | 0.615          | 0.564 | 1.23<br>(1.02–1.47)   | 2.65×10 <sup>-2</sup>  | 1.35<br>(1.21–1.50)  | 3.58×10 <sup>-8</sup>  | 39.1           | 0.20 |
| rs3775948                          | 4p16.1   | 9995182               | SLC2A9                | C       | G        | 0.690          | 0.587 | 1.61<br>(1.40–1.85)  | 2.14×10 <sup>-11</sup> | 0.672          | 0.565 | 1.57<br>(1.3–1.88)    | 2.16×10 <sup>-6</sup>  | 1.59<br>(1.42–1.78)  | 2.41×10 <sup>-16</sup> | 0              | 0.83 |
| rs2231142                          | 4q22.1   | 89052323              | ABCG2                 | T       | G        | 0.474          | 0.289 | 2.27<br>(1.98–2.59)  | 1.06×10 <sup>-32</sup> | 0.474          | 0.281 | 2.30<br>(1.91–2.76)   | 5.37×10 <sup>-19</sup> | 2.28<br>(2.04–2.54)  | 5.20×10 <sup>-50</sup> | 0              | 0.90 |
| rs3129399                          | 10q23.2  | 88951662              | FAM35A                | G       | A        | 0.458          | 0.377 | 1.56<br>(1.35–1.80)  | 1.07×10 <sup>-9</sup>  | 0.438          | 0.399 | 1.30<br>(1.06–1.61)   | 1.37×10 <sup>-2</sup>  | 1.47<br>(1.31–1.66)  | 1.33×10 <sup>-10</sup> | 49.8           | 0.16 |
| rs56093838                         | 11q13.1  | 64383327              | NRXN2                 | C       | T        | 0.489          | 0.428 | 1.36<br>(1.18–1.55)  | 1.27×10 <sup>-5</sup>  | 0.493          | 0.409 | 1.48<br>(1.22–1.78)   | 4.88×10 <sup>-5</sup>  | 1.40<br>(1.25–1.56)  | 3.28×10 <sup>-9</sup>  | 0              | 0.46 |
| rs116873087                        | 12q24.13 | 112511913             | NAA25(ALDH2)          | G       | C        | 0.828          | 0.759 | 2.12<br>(1.72–2.60)  | 1.12×10 <sup>-12</sup> | 0.845          | 0.686 | 2.50<br>(1.97–3.17)   | 4.19×10 <sup>-14</sup> | 2.27<br>(1.95–2.66)  | 5.31×10 <sup>-25</sup> | 4.9            | 0.31 |

\*dbSNP rs number, <sup>†</sup>SNP positions are based on NCBI human genome reference sequence Build hg19. SNP, single nucleotide polymorphism; RAF, risk allele frequency; Ctrl, control; OR, odds ratio; CI, confidence interval; HetP, heterogeneity P value; RUE, renal underexcretion; ROL, renal overload.

157 **Supplementary Table S6. Characteristics of Japanese males without medication for urate-lowering therapy**  
 158 **who took part in the study**  
 159

|                                      | Japonica array platform |            | Illumina array platform |            | Total       |            |
|--------------------------------------|-------------------------|------------|-------------------------|------------|-------------|------------|
|                                      | Case                    | Control    | Case                    | Control    | Case        | Control    |
| Number                               | 1,028                   | 1,125      | 2,025                   | 4,512      | 3,053       | 5,637      |
| Age (year)                           | 44.6 ± 11.4             | 53.9 ± 9.2 | 48.0 ± 11.8             | 55.3 ± 9.3 | 46.9 ± 11.8 | 55.0 ± 9.3 |
| Body-mass index (kg/m <sup>2</sup> ) | 25.2 ± 3.6              | 23.1 ± 2.9 | 25.0 ± 3.5              | 23.8 ± 3.1 | 25.0 ± 3.6  | 23.7 ± 3.1 |

160 Data are expressed as means ± SD; case data are from Nakayama *et al.* [1], under the terms of the Creative Commons  
 161 Attribution 4.0 international License (<https://creativecommons.org/licenses/by/4.0/>).  
 162

163  
 164 **Supplementary Table S7. Clinical parameters of subtype gout cases**  
 165

|                         |               | Number | Age (year)  | BMI (kg/m <sup>2</sup> ) | SUA (mg/dL) | FE <sub>UA</sub> (%) | UUE (mg/h/1.73m <sup>2</sup> ) |
|-------------------------|---------------|--------|-------------|--------------------------|-------------|----------------------|--------------------------------|
| Japonica array platform | RUE type      | 211    | 47.7 ± 10.8 | 24.9 ± 3.4               | 8.36 ± 1.28 | 3.78 ± 0.82          | 20.6 ± 3.6                     |
|                         | ROL type      | 137    | 48.7 ± 11.2 | 24.3 ± 2.9               | 8.17 ± 1.18 | 6.58 ± 0.96          | 37.6 ± 8.6                     |
|                         | Combined type | 349    | 43.6 ± 10.0 | 25.4 ± 3.7               | 8.75 ± 1.22 | 4.34 ± 0.69          | 31.9 ± 7.3                     |
| Illumina array platform | RUE type      | 443    | 47.6 ± 11.0 | 25.0 ± 3.8               | 8.38 ± 1.15 | 3.78 ± 0.82          | 20.2 ± 3.5                     |
|                         | ROL type      | 349    | 50.0 ± 10.9 | 24.5 ± 3.0               | 8.20 ± 1.14 | 6.89 ± 1.62          | 36.4 ± 9.2                     |
|                         | Combined type | 556    | 44.4 ± 9.9  | 25.9 ± 3.8               | 8.76 ± 1.24 | 4.41 ± 0.72          | 31.6 ± 6.5                     |
| Total                   | RUE type      | 654    | 47.6 ± 10.9 | 24.9 ± 3.6               | 8.37 ± 1.19 | 3.78 ± 0.82          | 20.3 ± 3.5                     |
|                         | ROL type      | 486    | 49.7 ± 11.0 | 24.4 ± 2.9               | 8.19 ± 1.15 | 6.81 ± 1.47          | 36.7 ± 9.0                     |
|                         | Combined type | 905    | 44.1 ± 9.9  | 25.6 ± 3.7               | 8.75 ± 1.22 | 4.39 ± 0.71          | 31.7 ± 6.8                     |

166 Data are expressed as means ± SD; some case data are from Nakayama *et al.* [1], under the terms of the Creative  
 167 Commons Attribution 4.0 International License (<https://creativecommons.org/licenses/by/4.0/>).  
 168

168 Normal type, which is characterized by UUE ≤ 25 mg/h/1.73 m<sup>2</sup> and FE<sub>UA</sub> ≥ 5.5%, was excluded in this study due to  
 169 the small number of patients (total 92 cases). BMI, body-mass index; SUA, serum uric acid; FE<sub>UA</sub>, fractional  
 170 excretion of uric acid; UUE, urinary urate excretion; RUE, renal underexcretion; ROL, renal overload.  
 171

172 **Supplementary Table S8. Genotyping, imputation, and association testing**

173

| Study name              | Genotyping platform                                  | Genotype calling algorithm | Pre-imputation QC       |                                                                                                 | SNP call rate cutoff | SNP MAF cutoff | SNP HWE P cutoff   | #SNPs for imputation | Imputation reference                          | Imputation software | Post-imputation QC |                | Association study software | Study specific covariates for association study |
|-------------------------|------------------------------------------------------|----------------------------|-------------------------|-------------------------------------------------------------------------------------------------|----------------------|----------------|--------------------|----------------------|-----------------------------------------------|---------------------|--------------------|----------------|----------------------------|-------------------------------------------------|
|                         |                                                      |                            | Sample call rate cutoff | Other criteria                                                                                  |                      |                |                    |                      |                                               |                     | SNP $r^2$ cutoff   | SNP MAF cutoff |                            |                                                 |
| Japonica array platform | Japonica SNP Array                                   | Genome Studio              | 0.98                    | Sex mismatches; related samples (IBD 0.1875); samples not mapping to JPT (1000 genomes phase 3) | 0.98                 | 0.01           | $1 \times 10^{-6}$ | 603,009              | 1000G phase3v5; individuals of all ancestries | SHAPEIT2 minimac3   | 0.3                | 0.001 or 0.01  | EPACTS                     | Top 10 principal components                     |
| Illumina array platform | Illumina HumanOmni Express or HumanOmni ExpressExome | Genome Studio              | 0.98                    | Sex mismatches; related samples (IBD 0.1875); samples not mapping to JPT (1000 genomes phase 3) | 0.98                 | 0.01           | $1 \times 10^{-6}$ | 553,321              | 1000G phase3v5; individuals of all ancestries | SHAPEIT2 minimac3   | 0.3                | 0.001 or 0.01  | EPACTS                     | Top 10 principal components                     |

174

QC, quality control; MAF, minor allele frequency; HWE, Hardy-Weinberg equilibrium; #SNPs, the number of autosomal single nucleotide polymorphisms.

175



176 **Supplementary Figure**

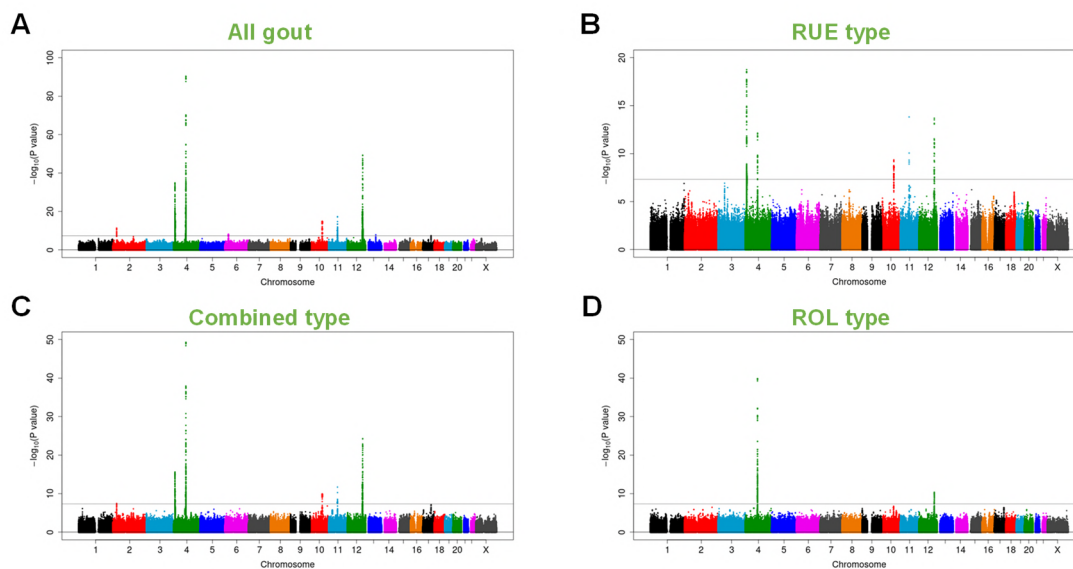

194 **Supplementary Figure S1. Manhattan plots of genome-wide meta-analyses of gout using single nucleotide**

195 **variations (SNVs) with minor allele frequency (MAF)  $\geq 0.1\%$**   
196 For all gout, (A); RUE type, (B); combined (RUE +ROL) type, (C); ROL type, (D). The horizontal axis represents  
197 chromosomal positions and the vertical axis indicates the  $-\log_{10}(P$  value) for the assessment of the association.  
198 Horizontal lines represent the genome-wide significance threshold ( $\alpha = 5 \times 10^{-8}$ ). While all data shown in **Fig. 1** were  
199 derived from SNPs with  $MAF \geq 1\%$ , all data in this **Supplementary Figure S1** were from SNVs with  $MAF \geq 0.1\%$ .
